# Supplementary material for: Limited trophic partitioning among sympatric delphinids off a tropical oceanic atoll
Source: PLoS One. 2017 Aug 2;12(8):e0181526. doi: 10.1371/journal.pone.0181526 (PMC5540553; doi:10.1371/journal.pone.0181526)
Supplement: S1 File — (XLSX) [file pone.0181526.s003.xlsx]

## Sheet: data
Origin Metadata Spreadsheet	Origin Isotope Data Spreadsheet	Year SIA Run	Date Sampled	Lipid Extracted?	Sample ID	Sample ID2	Species	Common Name	Location	Latitude	Longitude	d13C	d15N	C Amount (ug)	%C	N Amount (ug)	%N	C:N	Amount (mg)	Amount (ug)	Comments
summary 2010 data with end members	Nigro WHALES1 0815	2015	2008	yes	RLPX PEEL		Peponocephala electra	Melon-headed Whale	Palmyra Atoll			-14.9883	15.9943	432.831	41.4628	147.23	14.1039	2.93982	1.0439	1043.9
summary 2010 data with end members	Nigro WHALES1 0815	2015	2008	yes	RLPZ PEEL		Peponocephala electra	Melon-headed Whale	Palmyra Atoll			-15.095	16.1307	300.931	37.3595	101.587	12.6117	2.96228	0.8055	805.5
summary 2010 data with end members	Nigro WHALES1 0815	2015	2008	yes	RLPY PEEL		Peponocephala electra	Melon-headed Whale	Palmyra Atoll			-15.923	14.5438	404.475	41.617	131.104	13.4895	3.08514	0.9719	971.9
Palmyra Tissue Request/ whale_metadata (2008)	Nigro WHALES1 0815	2015	2008-08-25	yes	74882 PELE RLP2		Peponocephala electra	Melon-headed Whale	Palmyra Atoll	5.9	-162.1	-16.4926	14.4538	257.361	26.4884	82.947	8.53716	3.10272	0.9716	971.6
Palmyra Tissue Request/ whale_metadata (2008)	Nigro WHALES1 0815	2015	2008-08-25	yes	74883 PELE RLP3		Peponocephala electra	Melon-headed Whale	Palmyra Atoll	5.9	-162.1	-16.412	14.1225	267.163	28.7025	85.9141	9.23014	3.10965	0.9308	930.8
Palmyra Tissue Request/ whale_metadata (2008)	Nigro WHALES1 0815	2015	2008-08-25	yes	74885 PELE RLP5		Peponocephala electra	Melon-headed Whale	Palmyra Atoll	5.9	-162.1	-16.5495	14.3477	243.205	25.579	77.6792	8.16988	3.13089	0.9508	950.8
Palmyra Tissue Request/ whale_metadata (2008)	Nigro WHALES1 0815	2015	2008-08-26	yes	74887 PELE RLP7		Peponocephala electra	Melon-headed Whale	Palmyra Atoll	5.85	-162.117	-15.7102	15.1004	256.272	26.428	84.7657	8.74144	3.0233	0.9697	969.7
Palmyra Tissue Request/ whale_metadata (2008)	Nigro WHALES1 0815	2015	2008-08-26	yes	74889 PELE RLP9		Peponocephala electra	Melon-headed Whale	Palmyra Atoll	5.85	-162.117	-16.2565	14.6585	247.56	24.9205	80.4573	8.09919	3.07691	0.9934	993.4
Palmyra Tissue Request/ whale_metadata (2008)	Nigro WHALES1 0815	2015	2008-08-26	yes	74886 PELE RLP6		Peponocephala electra	Melon-headed Whale	Palmyra Atoll	5.85	-162.117	-16.2334	14.6997	231.228	24.7382	74.8999	8.01325	3.08716	0.9347	934.7
Palmyra Tissue Request/ whale_metadata (2008)	Nigro WHALES1 0815	2015	2008-08-26	yes	74890 PELE RLP10		Peponocephala electra	Melon-headed Whale	Palmyra Atoll	5.85	-162.117	-16.5377	14.5953	242.116	25.3418	77.4876	8.11049	3.12458	0.9554	955.4
Palmyra Tissue Request/ whale_metadata (2008)	Nigro WHALES1 0815	2015	2008-08-26	yes	74888 PELE RLP8		Peponocephala electra	Melon-headed Whale	Palmyra Atoll	5.85	-162.117	-16.3704	14.9909	264.985	26.13	84.0957	8.29265	3.15099	1.0141	1014.1
Palmyra Tissue Request/ whale_metadata (2008)	Nigro WHALES1 0815	2015	2008-08-26	yes	74891 TTRU RLP11		Tursiops truncatus	Bottlenose Dolphin	Palmyra Atoll	5.86667	-162.167	-15.3228	16.8028	297.662	28.6572	104.45	10.0559	2.8498	1.0387	1038.7
summary 2010 data with end members/whale_metadata (2008)	Nigro WHALES1 0815	2015	2008-08-27	yes	RLP13 TUTR		Tursiops truncatus	Bottlenose Dolphin	Palmyra Atoll	5° 51'	162° 09'	-16.0643	15.1438	130.017	19.6727	42.2207	6.38837	3.07945	0.6609	660.9
summary 2010 data with end members/whale_metadata (2008)	Nigro WHALES1 0815	2015	2008-08-27	yes	RLP12 TUTR		Tursiops truncatus	Bottlenose Dolphin	Palmyra Atoll	5° 52'	162° 08'	-17.0587	15.1958	367.407	38.2118	111.125	11.5574	3.30625	0.9615	961.5
Palmyra Tissue Request/ whale_metadata (2008)	Nigro WHALES1 0815	2015	2008-09-01	yes	74894 TTRU RLP14		Tursiops truncatus	Bottlenose Dolphin	Palmyra Atoll	5.91667	-162.117	-15.0551	16.5046	283.501	27.6802	96.8132	9.45257	2.92833	1.0242	1024.2
summary 2010 data with end members/whale_metadata (2008)	Nigro WHALES1 0815	2015	2008-09-03	yes	RLP15 PEEL		Peponocephala electra	Melon-headed Whale	Palmyra Atoll	5° 55'	162° 09'	-15.7898	13.925	99.1272	22.5136	34.6995	7.88088	2.85673	0.4403	440.3	Precision decreases for samples containing less than 100ugC
Palmyra Tissue Request/ whale_metadata (2008)	Nigro WHALES1 0815	2015	2008-09-03	yes	74897 PELE RLP17		Peponocephala electra	Melon-headed Whale	Palmyra Atoll	5.91667	-162.15	-14.9499	16.7268	194.215	37.7851	67.1301	13.0603	2.89311	0.514	514
Palmyra Tissue Request/ whale_metadata (2008)	Nigro WHALES1 0815	2015	2008-09-03	yes	74899 PELE RLP19		Peponocephala electra	Melon-headed Whale	Palmyra Atoll	5.91667	-162.15	-16.2645	14.9261	291.126	28.9275	93.7558	9.31596	3.10515	1.0064	1006.4
Palmyra Tissue Request/ whale_metadata (2008)	Nigro WHALES1 0815	2015	2008-09-03	yes	74896 PELE RLP16		Peponocephala electra	Melon-headed Whale	Palmyra Atoll	5.91667	-162.15	-16.0802	14.5165	222.518	24.3535	71.6397	7.84061	3.10607	0.9137	913.7
Palmyra Tissue Request/ whale_metadata (2008)	Nigro WHALES1 0815	2015	2008-09-03	yes	74898 PELE RLP18		Peponocephala electra	Melon-headed Whale	Palmyra Atoll	5.91667	-162.15	-16.4702	14.7423	300.931	30.8299	96.8132	9.91837	3.10836	0.9761	976.1
summary 2010 data with end members/whale_metadata (2008)	Nigro WHALES1 0815	2015	2008-09-04	yes	RLP21 TUTR		Tursiops truncatus	Bottlenose Dolphin	Palmyra Atoll	5° 52'	162° 00'	-13.9609	18.2082	328.17	41.0008	117.792	14.7166	2.78602	0.8004	800.4
summary 2010 data with end members/whale_metadata (2008)	Nigro WHALES1 0815	2015	2008-09-04	yes	RLP20 TUTR		Tursiops truncatus	Bottlenose Dolphin	Palmyra Atoll	5° 52'	162° 00'	-15.2901	15.9505	437.193	42.6613	148.178	14.4592	2.95047	1.0248	1024.8
summary 2010 data with end members/whale_metadata (2008)	Nigro WHALES1 0815	2015	2008-09-09	yes	RLP23 PEEL		Peponocephala electra	Melon-headed Whale	Palmyra Atoll	5° 54'	162° 05'	-14.7552	16.2878	365.226	40.9906	126.353	14.1811	2.89052	0.891	891
summary 2010 data with end members/whale_metadata (2008)	Nigro WHALES1 0815	2015	2008-09-09	yes	RLP22 PEEL		Peponocephala electra	Melon-headed Whale	Palmyra Atoll	5° 54'	162° 05'	-15.1061	16.2568	419.743	42.2829	144.388	14.545	2.90705	0.9927	992.7
Palmyra Tissue Request/ whale_metadata (2008)	Nigro WHALES1 0815	2015	2008-09-09	yes	74905 PELE RLP25		Peponocephala electra	Melon-headed Whale	Palmyra Atoll	5.9	-162.083	-16.0254	15.2799	260.628	24.139	85.6271	7.93063	3.04376	1.0797	1079.7
Palmyra Tissue Request/ whale_metadata (2008)	Nigro WHALES1 0815	2015	2008-09-09	yes	74906 PELE RLP26		Peponocephala electra	Melon-headed Whale	Palmyra Atoll	5.9	-162.083	-16.3934	14.7464	286.769	28.6425	92.1309	9.20205	3.11262	1.0012	1001.2
Palmyra Tissue Request/ whale_metadata (2008)	Nigro WHALES1 0815	2015	2008-09-09	yes	74904 PELE RLP24		Peponocephala electra	Melon-headed Whale	Palmyra Atoll	5.9	-162.083	-16.4825	15.0806	266.074	26.5702	84.5743	8.44561	3.14603	1.0014	1001.4
summary 2010 data with end members/whale_metadata (2008)	Nigro WHALES1 0815	2015	2008-09-12	yes	RLP27 STLO		Stenella longirostris	Spinner Dolphin	Palmyra Atoll	5° 52'	162° 07'	-14.835	16.6427	397.933	40.7969	137.75	14.1224	2.88881	0.9754	975.4
Palmyra Tissue Request/ whale_metadata (2008)	Nigro WHALES1 0815	2015	2008-09-12	yes	74908 SLON RLP28		Stenella longirostris	Spinner Dolphin	Palmyra Atoll	5.86667	-162.117	-16.6232	13.3815	266.074	27.192	86.2969	8.8193	3.08324	0.9785	978.5
summary 2010 data with end members/whale_metadata (2008)	Nigro WHALES1 0815	2015	2008-09-16	yes	RLP30 TUTR		Tursiops truncatus	Bottlenose Dolphin	Palmyra Atoll	5° 55'	162° 04'	-15.0726	16.5401	527.762	45.4224	177.469	15.274	2.97383	1.1619	1161.9
Palmyra Tissue Request/ whale_metadata (2008)	Nigro WHALES1 0815	2015	2008-09-16	yes	74909 TTRU RLP29		Tursiops truncatus	Bottlenose Dolphin	Palmyra Atoll	5.91667	-162.067	-16.0601	14.9194	233.405	24.3105	75.9542	7.91108	3.07297	0.9601	960.1
Palmyra Tissue Request/ whale_metadata (2008)	Nigro WHALES1 0815	2015	2008-09-18	yes	74911 SLON RLP31		Stenella longirostris	Spinner Dolphin	Palmyra Atoll	5.88333	-162.133	-14.7568	15.6264	315.094	31.7571	111.125	11.1998	2.8355	0.9922	992.2
Palmyra Tissue Request/ whale_metadata (2008)	Nigro WHALES1 0815	2015	2008-09-18	yes	74913 SLON RLP33		Stenella longirostris	Spinner Dolphin	Palmyra Atoll	5.88333	-162.133	-16.028	14.0975	286.769	29.2442	94.9025	9.678	3.02172	0.9806	980.6
Palmyra Tissue Request/ whale_metadata (2008)	Nigro WHALES1 0815	2015	2008-09-19	yes	74914 TTRU RLP34		Tursiops truncatus	Bottlenose Dolphin	Palmyra Atoll	5.91667	-162.133	-16.1227	15.5216	304.199	30.8894	100.633	10.2186	3.02286	0.9848	984.8
marine mammal summary data 2011	marine mammal summary data 2011	pre-2015	2009-09-13	yes	Tt38	ZEN090913.01a	Tursiops truncatus	Bottlenose Dolphin	Palmyra Atoll	5	-162	-15.0698	16.5147		45.115		15.098	3.48464	0.46
marine mammal summary data 2011	marine mammal summary data 2011	pre-2015	2009-09-13	yes	Tt39	ZEN090913.02a	Tursiops truncatus	Bottlenose Dolphin	Palmyra Atoll	5	-162	-16.6161	15.5304		46.3626		14.6079	3.70114	0.51
marine mammal summary data 2011	marine mammal summary data 2011	pre-2015	2009-09-22	yes	Tt40	ZEN090922.01a	Tursiops truncatus	Bottlenose Dolphin	Palmyra Atoll	5	-162	-16.2381	16.3376		45.4748		14.2005	3.73443	0.54
marine mammal summary data 2011	marine mammal summary data 2011	pre-2015	2009-10-06	yes	Tt44	ZEN091006.04a	Tursiops truncatus	Bottlenose Dolphin	Palmyra Atoll	5	-162	-14.4702	18.098		45.6067		15.2153	3.49547	0.49
marine mammal summary data 2011	marine mammal summary data 2011	pre-2015	2009-10-06	yes	Tt42	ZEN091006.02a	Tursiops truncatus	Bottlenose Dolphin	Palmyra Atoll	5	-162	-16.1342	15.4136		47.1231		14.5316	3.78162	0.53
marine mammal summary data 2011	marine mammal summary data 2011	pre-2015	2009-10-06	yes	Tt43	ZEN091006.03a	Tursiops truncatus	Bottlenose Dolphin	Palmyra Atoll	5	-162	-16.8371	15.4777		45.7803		13.8661	3.85018	0.46
marine mammal summary data 2011	marine mammal summary data 2011	pre-2015	2009-10-06	yes	Tt41	ZEN091006.01a	Tursiops truncatus	Bottlenose Dolphin	Palmyra Atoll	5	-162	-16.3594	14.5547		46.7288		14.1	3.86475	0.55
marine mammal summary data 2011	marine mammal summary data 2011	pre-2015	2010-06-05	yes	SL1	2010 0605.A	Stenella longirostris	Spinner Dolphin	Palmyra Atoll			-15.416	16.8566		45.2346		15.116	3.48971	0.48
marine mammal summary data 2011	marine mammal summary data 2011	pre-2015	2010-06-06 13:58:49	yes	Tt1	ZEN100606.01a	Tursiops truncatus	Bottlenose Dolphin	Palmyra Atoll	5.9029	-162.064	-16.5813	16.0852		52.7205		16.9594	3.62515	0.6
marine mammal summary data 2011	marine mammal summary data 2011	pre-2015	2010-06-06 14:04:14	yes	Tt2	ZEN100606.02a	Tursiops truncatus	Bottlenose Dolphin	Palmyra Atoll	5.90763	-162.07	-16.7063	16.1347		45.5682		14.4641	3.67388	0.61
marine mammal summary data 2011	marine mammal summary data 2011	pre-2015	2010-06-06 14:10:37	yes	Tt3	ZEN100606.03a	Tursiops truncatus	Bottlenose Dolphin	Palmyra Atoll	5.90842	-162.071	-16.6742	15.5304		45.5284		14.56	3.6465	0.47
marine mammal summary data 2011	marine mammal summary data 2011	pre-2015	2010-06-06 14:16:52	yes	Tt4	ZEN100606.04a	Tursiops truncatus	Bottlenose Dolphin	Palmyra Atoll	5.91191	-162.075	-16.8248	15.5588		46.488		14.7455	3.67652	0.52
marine mammal summary data 2011	marine mammal summary data 2011	pre-2015	2010-06-07 10:00:11	yes	Tt5	ZEN100607.01a	Tursiops truncatus	Bottlenose Dolphin	Palmyra Atoll	5.8668	-162.163	-16.0499	15.5554		43.6709		14.2249	3.58014	0.59
marine mammal summary data 2011	marine mammal summary data 2011	pre-2015	2010-06-07 10:10:12	yes	Tt6	ZEN100607.02a	Tursiops truncatus	Bottlenose Dolphin	Palmyra Atoll	5.86953	-162.162	-16.3392	15.3908		44.2836		14.1206	3.65719	0.55
marine mammal summary data 2011	marine mammal summary data 2011	pre-2015	2010-06-07 10:55:17	yes	Tt7	ZEN100607.03a	Tursiops truncatus	Bottlenose Dolphin	Palmyra Atoll	5.88435	-162.165	-16.479	15.3892		45.3718		14.3863	3.67785	0.58
marine mammal summary data 2011	marine mammal summary data 2011	pre-2015	2010-06-07 11:43:00	yes	Tt8	ZEN100607.04a	Tursiops truncatus	Bottlenose Dolphin	Palmyra Atoll	5.86257	-162.111	-15.786	15.8332		43.3903		13.8915	3.64251	0.51
marine mammal summary data 2011	marine mammal summary data 2011	pre-2015	2010-06-10 14:50:41	yes	Tt9	ZEN100610.01a	Tursiops truncatus	Bottlenose Dolphin	Palmyra Atoll	5.87914	-162.001	-16.281	16.0537		44.6055		14.6731	3.54506	0.53
marine mammal summary data 2011	marine mammal summary data 2011	pre-2015	2010-06-10 15:08:16	yes	Tt10	ZEN100610.02a	Tursiops truncatus	Bottlenose Dolphin	Palmyra Atoll	5.88412	-161.994	-16.072	16.6309		44.9546		14.6793	3.57131	0.55
marine mammal summary data 2011	marine mammal summary data 2011	pre-2015	2010-06-10 15:20:18	yes	Tt11	ZEN100610.03a	Tursiops truncatus	Bottlenose Dolphin	Palmyra Atoll	5.89094	-161.998	-15.8305	16.135		42.87		14.2029	3.51993	0.49
marine mammal summary data 2011	marine mammal summary data 2011	pre-2015	2010-06-10 15:44:46	yes	Tt12	ZEN100610.04a	Tursiops truncatus	Bottlenose Dolphin	Palmyra Atoll	5.88709	-162.007	-16.0287	16.5909		43.7529		14.5221	3.51345	0.51
marine mammal summary data 2011	marine mammal summary data 2011	pre-2015	2010-06-10 18:04:10	yes	Tt13	ZEN100610.05a	Tursiops truncatus	Bottlenose Dolphin	Palmyra Atoll	5.90333	-162.118	-13.9554	17.6174		42.8021		15.2646	3.26992	0.54
marine mammal summary data 2011	marine mammal summary data 2011	pre-2015	2010-06-11 10:14:31	yes	Pe16	ZEN100614.06a	Peponocephala electra	Melon-headed Whale	Palmyra Atoll	5.90536	-162.054	-15.0504	17.0296		42.5637		14.2418	3.48522	0.52
marine mammal summary data 2011	marine mammal summary data 2011	pre-2015	2010-06-11 10:14:31	yes	Pe2	ZEN100611.01a	Peponocephala electra	Melon-headed Whale	Palmyra Atoll	5.89907	-162.113	-15.7333	16.5328		45.6791		14.4384	3.6894	0.51
marine mammal summary data 2011	marine mammal summary data 2011	pre-2015	2010-06-11 10:22:58	yes	Pe3	ZEN100611.02a	Peponocephala electra	Melon-headed Whale	Palmyra Atoll	5.89755	-162.116	-16.1106	16.3817		47.4431		13.8932	3.98226	0.57
marine mammal summary data 2011	marine mammal summary data 2011	pre-2015	2010-06-11 10:30:01	yes	Pe4	ZEN100611.03a	Peponocephala electra	Melon-headed Whale	Palmyra Atoll	5.89927	-162.119	-15.2156	16.8886		44.4165		14.747	3.51234	0.54
marine mammal summary data 2011	marine mammal summary data 2011	pre-2015	2010-06-11 10:35:59	yes	Pe5	ZEN100611.04a	Peponocephala electra	Melon-headed Whale	Palmyra Atoll	5.89943	-162.122	-16.3097	16.0319		47.4581		14.5257	3.81004	0.54
marine mammal summary data 2011	marine mammal summary data 2011	pre-2015	2010-06-11 10:46:56	yes	Pe6	ZEN100611.05a	Peponocephala electra	Melon-headed Whale	Palmyra Atoll	5.89947	-162.124	-15.4744	16.9976		44.9784		15.3235	3.42298	0.46
marine mammal summary data 2011	marine mammal summary data 2011	pre-2015	2010-06-12 11:53:42	yes	Tt14	ZEN100612.01a	Tursiops truncatus	Bottlenose Dolphin	Palmyra Atoll	5.89932	-162.113	-15.7032	16.6771		42.7941		14.406	3.46416	0.6
marine mammal summary data 2011	marine mammal summary data 2011	pre-2015	2010-06-12 11:54:21	yes	Pe7	ZEN100612.02a	Peponocephala electra	Melon-headed Whale	Palmyra Atoll	5.89932	-162.113	-15.1161	16.808		85.0094		28.5782	3.46887	0.48
marine mammal summary data 2011	marine mammal summary data 2011	pre-2015	2010-06-12 12:01:43	yes	Pe8	ZEN100612.03a	Peponocephala electra	Melon-headed Whale	Palmyra Atoll	5.89896	-162.111	-15.7804	16.8586		45.0277		13.6598	3.84407	0.43
marine mammal summary data 2011	marine mammal summary data 2011	pre-2015	2010-06-12 12:07:14	yes	Pe9	ZEN100612.04a	Peponocephala electra	Melon-headed Whale	Palmyra Atoll	5.89843	-162.114	-14.7512	16.5706		42.5168		14.6384	3.38706	0.44
marine mammal summary data 2011	marine mammal summary data 2011	pre-2015	2010-06-12 12:16:21	yes	Pe10	ZEN100612.05a	Peponocephala electra	Melon-headed Whale	Palmyra Atoll	5.90011	-162.114	-15.6128	15.7264		46.6867		14.863	3.66305	0.48
marine mammal summary data 2011	marine mammal summary data 2011	pre-2015	2010-06-12 12:25:21	yes	Pe11	ZEN100612.06a	Peponocephala electra	Melon-headed Whale	Palmyra Atoll	5.89877	-162.115	-16.0007	16.4886		44.5476		14.4309	3.59988	0.52
marine mammal summary data 2011	marine mammal summary data 2011	pre-2015	2010-06-12 13:29:25	yes	Tt16	ZEN100612.08a	Tursiops truncatus	Bottlenose Dolphin	Palmyra Atoll	5.90566	-162.033	-15.5609	16.4274		44.5589		14.6382	3.54979	0.49
marine mammal summary data 2011	marine mammal summary data 2011	pre-2015	2010-06-12 15:00:38	yes	Tt17	ZEN100612.09a	Tursiops truncatus	Bottlenose Dolphin	Palmyra Atoll	5.90936	-162.144	-15.2312	16.6659		42.9086		14.3865	3.47813	0.52
marine mammal summary data 2011	marine mammal summary data 2011	pre-2015	2010-06-14 14:57:35	yes	Pe12	ZEN100614.01a	Peponocephala electra	Melon-headed Whale	Palmyra Atoll	5.8952	-162.039	-16.2112	15.9974		45.5767		13.9117	3.82048	0.54
marine mammal summary data 2011	marine mammal summary data 2011	pre-2015	2010-06-14 16:54:28	yes	Tt18	ZEN100614.02a	Tursiops truncatus	Bottlenose Dolphin	Palmyra Atoll	5.89647	-162.053	-15.7526	16.3883		44.5207		14.9291	3.47763	0.6
marine mammal summary data 2011	marine mammal summary data 2011	pre-2015	2010-06-14 16:58:04	yes	Pe13	ZEN100614.03a	Peponocephala electra	Melon-headed Whale	Palmyra Atoll	5.89795	-162.054	-13.7186	16.524		43.8066		15.8272	3.22769	0.5
marine mammal summary data 2011	marine mammal summary data 2011	pre-2015	2010-06-14 17:07:11	yes	Pe14	ZEN100614.04a	Peponocephala electra	Melon-headed Whale	Palmyra Atoll	5.89993	-162.053	-16.375	16.2753		45.6677		13.7411	3.87565	0.48
marine mammal summary data 2011	marine mammal summary data 2011	pre-2015	2010-06-14 17:12:29	yes	Pe15	ZEN100614.05a	Peponocephala electra	Melon-headed Whale	Palmyra Atoll	5.90275	-162.054	-15.5646	17.6724		47.8304		13.6226	4.0945	0.47
marine mammal summary data 2011	marine mammal summary data 2011	pre-2015	2010-06-14 17:25:20	yes	Pe17	ZEN100614.07a	Peponocephala electra	Melon-headed Whale	Palmyra Atoll	5.90877	-162.058	-16.0564	17.0941		42.8631		13.3208	3.75241	0.55
marine mammal summary data 2011	marine mammal summary data 2011	pre-2015	2010-06-15	yes	SL3	2010 JUN 15.04.B	Stenella longirostris	Spinner Dolphin	Palmyra Atoll			-16.2083	15.2835		46.2578		15.2178	3.54478	0.5
marine mammal summary data 2011	marine mammal summary data 2011	pre-2015	2010-06-15 12:35:41	yes	Tt19	ZEN100615.01a	Tursiops truncatus	Bottlenose Dolphin	Palmyra Atoll	5.91756	-162.077	-15.0079	16.8769		43.1944		14.7883	3.40618	0.55
marine mammal summary data 2011	marine mammal summary data 2011	pre-2015	2010-06-15 12:58:20	yes	Tt20	ZEN100615.02a	Tursiops truncatus	Bottlenose Dolphin	Palmyra Atoll	5.91896	-162.067	-16.1501	16.6172		44.7279		13.9887	3.7287	0.55
marine mammal summary data 2011	marine mammal summary data 2011	pre-2015	2010-06-15 13:15:33	yes	Tt21	ZEN100615.03a	Tursiops truncatus	Bottlenose Dolphin	Palmyra Atoll	5.92495	-162.068	-14.3378	17.8612		43.1548		15.1575	3.32016	0.5
marine mammal summary data 2011	marine mammal summary data 2011	pre-2015	2010-06-19 09:41:54	yes	Tt22	ZEN100619.01a	Tursiops truncatus	Bottlenose Dolphin	Palmyra Atoll	5.86177	-162.063	-14.5908	16.9178		42.7965		14.4833	3.44586	0.52
marine mammal summary data 2011	marine mammal summary data 2011	pre-2015	2010-06-19 10:32:21	yes	Tt23	ZEN100619.02a	Tursiops truncatus	Bottlenose Dolphin	Palmyra Atoll	5.87573	-161.994	-16.3154	16.4602		44.0794		14.2195	3.61499	0.42
marine mammal summary data 2011	marine mammal summary data 2011	pre-2015	2010-06-19 10:38:35	yes	Tt24	ZEN100619.03a	Tursiops truncatus	Bottlenose Dolphin	Palmyra Atoll	5.87573	-161.994	-14.9493	16.6405		45.3419		15.5596	3.39828	0.52
marine mammal summary data 2011	marine mammal summary data 2011	pre-2015	2010-06-19 10:43:22	yes	Tt25	ZEN100619.04a	Tursiops truncatus	Bottlenose Dolphin	Palmyra Atoll	5.87534	-161.995	-14.3884	17.332		42.8711		15.4693	3.23185	0.46
marine mammal summary data 2011	marine mammal summary data 2011	pre-2015	2010-06-19 10:50:59	yes	Tt26	ZEN100619.05a	Tursiops truncatus	Bottlenose Dolphin	Palmyra Atoll	5.87341	-161.997	-15.9649	15.66		44.0994		14.5208	3.54159	0.53
marine mammal summary data 2011	marine mammal summary data 2011	pre-2015	2010-06-19 12:01:30	yes	Tt27	ZEN100619.06a	Tursiops truncatus	Bottlenose Dolphin	Palmyra Atoll	5.89149	-162.039	-15.6381	16.208		42.7931		13.8927	3.59205	0.47
marine mammal summary data 2011	marine mammal summary data 2011	pre-2015	2010-06-19 12:08:05	yes	Tt28	ZEN100619.07a	Tursiops truncatus	Bottlenose Dolphin	Palmyra Atoll	5.89456	-162.042	-15.9385	15.6623		45.0237		14.8025	3.54702	0.45
marine mammal summary data 2011	marine mammal summary data 2011	pre-2015	2010-06-19 15:44:55	yes	Tt29	ZEN100619.08a	Tursiops truncatus	Bottlenose Dolphin	Palmyra Atoll	5.91438	-162.104	-16.5587	16.1217		46.0793		14.4217	3.72604	0.45
marine mammal summary data 2011	marine mammal summary data 2011	pre-2015	2010-06-20 10:29:07	yes	Tt30	ZEN100620.01a	Tursiops truncatus	Bottlenose Dolphin	Palmyra Atoll	5.90526	-162.124	-16.4342	17.4151		44.7058		13.9995	3.72397	0.56
marine mammal summary data 2011	marine mammal summary data 2011	pre-2015	2010-06-20 10:43:45	yes	Tt31	ZEN100620.02a	Tursiops truncatus	Bottlenose Dolphin	Palmyra Atoll	5.90093	-162.119	-16.2761	15.7741		44.8155		14.1491	3.69366	0.61
marine mammal summary data 2011	marine mammal summary data 2011	pre-2015	2010-06-20 11:39:33	yes	Tt32	ZEN100620.03a	Tursiops truncatus	Bottlenose Dolphin	Palmyra Atoll	5.92038	-162.096	-15.3702	16.4155		43.3885		14.3253	3.53204	0.48
marine mammal summary data 2011	marine mammal summary data 2011	pre-2015	2010-06-20 12:07:46	yes	Tt33	ZEN100620.04a	Tursiops truncatus	Bottlenose Dolphin	Palmyra Atoll	5.91935	-162.078	-15.2982	17.3725		45.1563		14.6631	3.59127	0.45
marine mammal summary data 2011	marine mammal summary data 2011	pre-2015	2010-06-20 12:37:37	yes	Tt34	ZEN100620.05a	Tursiops truncatus	Bottlenose Dolphin	Palmyra Atoll	5.93311	-162.063	-15.9425	15.9619		45.5558		14.7871	3.59266	0.57
marine mammal summary data 2011	marine mammal summary data 2011	pre-2015	2010-06-20 12:42:20	yes	Tt35	ZEN100620.06a	Tursiops truncatus	Bottlenose Dolphin	Palmyra Atoll	5.93342	-162.061	-16.1231	15.6026		45.848		14.765	3.62112	0.48
marine mammal summary data 2011	marine mammal summary data 2011	pre-2015	2010-06-20 12:48:02	yes	Tt36	ZEN100620.07a	Tursiops truncatus	Bottlenose Dolphin	Palmyra Atoll	5.93307	-162.06	-15.8338	17.1581		43.6783		14.491	3.51499	0.46
marine mammal summary data 2011	marine mammal summary data 2011	pre-2015	2010-06-20 12:55:56	yes	Tt37	ZEN100620.08a	Tursiops truncatus	Bottlenose Dolphin	Palmyra Atoll	5.92964	-162.057	-15.5069	16.4775		44.5244		14.4406	3.59558	0.59
marine mammal summary data 2011	marine mammal summary data 2011	pre-2015	2010-06-20 17:06:18	yes	Pe18	ZEN100620.09a	Peponocephala electra	Melon-headed Whale	Palmyra Atoll	5.92964	-162.057	-16.3528	16.3309		47.8651		14.1079	3.95651	0.53
marine mammal summary data 2011	marine mammal summary data 2011	pre-2015	2010-06-20 17:12:39	yes	Pe19	ZEN100620.10a	Peponocephala electra	Melon-headed Whale	Palmyra Atoll	5.86288	-162.112	-15.4353	16.6028		47.0113		15.2554	3.59364	0.56
marine mammal summary data 2011	marine mammal summary data 2011	pre-2015	2010-08-19	yes	SL2	2010 AUG 19.01.A	Stenella longirostris	Spinner Dolphin	Palmyra Atoll			-16.1796	15.2219		45.9021		15.1666	3.5294	0.59
marine mammal summary data 2011	marine mammal summary data 2011	pre-2015	2010-08-19 17:04:50	no	Orca	ZEN100819.01a	Orcinus orca	Orca whale	Palmyra Atoll	5.87254	-162.112	-16.4387	18.497		46.7555		10.0691	5.41503	0.52
whale_metadata_all years compiled (2011-2012)	Nigro WHALES1 0815	2015	2011-05-03	yes	ZEN110503-06 S3PEMHW		Peponocephala electra	Melon-headed Whale	Palmyra Atoll	5.86629	-162.086	-14.0376	16.5902	452.465	44.3115	158.588	15.5311	2.85309	1.0211	1021.1
whale_metadata_all years compiled (2011-2012)	Nigro WHALES1 0815	2015	2011-05-03	yes	ZEN110503-01A S3 PE		Peponocephala electra	Melon-headed Whale	Palmyra Atoll	5.86377	-162.059	-15.6409	16.3604	407.747	42.2404	136.801	14.1719	2.98059	0.9653	965.3
whale_metadata_all years compiled (2011-2012)	Nigro WHALES1 0815	2015	2011-05-03	yes	ZEN110503-04 S3 PE		Peponocephala electra	Melon-headed Whale	Palmyra Atoll	5.86558	-162.078	-15.7072	15.7878	424.105	43.6232	137.75	14.1689	3.07881	0.9722	972.2
whale_metadata_all years compiled (2011-2012)	Nigro WHALES1 0815	2015	2011-05-03	yes	ZEN110503-02A S3 PE		Peponocephala electra	Melon-headed Whale	Palmyra Atoll	5.86595	-162.08	-16.467	14.8446	420.833	42.0119	135.852	13.5621	3.09774	1.0017	1001.7
whale_metadata_all years compiled (2011-2012)	Nigro WHALES1 0815	2015	2011-05-03	yes	ZEN110503-05A S3 PE		Peponocephala electra	Melon-headed Whale	Palmyra Atoll	5.86623	-162.084	-15.9382	16.1927	447.011	43.6961	143.44	14.0215	3.11636	1.023	1023
whale_metadata_all years compiled (2011-2012)	Nigro WHALES1 0815	2015	2011-05-03	yes	ZEN110503-03A S3 PE		Peponocephala electra	Melon-headed Whale	Palmyra Atoll	5.86484	-162.083	-16.5123	14.9976	435.012	42.8457	138.699	13.6608	3.13639	1.0153	1015.3
whale_metadata_all years compiled (2011-2012)	Nigro WHALES1 0815	2015	2011-11-04	yes	OES111104-02 SL SD		Stenella longirostris	Spinner Dolphin	Palmyra Atoll	5.8616	-162.131	-14.3873	14.5811	463.375	43.1046	165.203	15.3677	2.80488	1.075	1075
whale_metadata_all years compiled (2011-2012)	Nigro WHALES1 0815	2015	2011-11-04	yes	OES111104-06 SL SD		Stenella longirostris	Spinner Dolphin	Palmyra Atoll	5.88435	-162.142	-15.6681	14.3621	408.837	44.526	139.647	15.2088	2.92765	0.9182	918.2
whale_metadata_all years compiled (2011-2012)	Nigro WHALES1 0815	2015	2011-11-04	yes	OES111104-05 SI SD		Stenella longirostris	Spinner Dolphin	Palmyra Atoll	5.86768	-162.14	-15.766	15.2663	379.398	41.0693	127.304	13.7805	2.98026	0.9238	923.8
whale_metadata_all years compiled (2011-2012)	Nigro WHALES1 0815	2015	2011-11-05	yes	OES111104-03 SL SD		Stenella longirostris	Spinner Dolphin	Palmyra Atoll	5.87087	-162.142	-14.3651	15.7941	428.468	43.5346	150.072	15.2481	2.85509	0.9842	984.2
whale_metadata_all years compiled (2011-2012)	Nigro WHALES1 0815	2015	2012-05-05	yes	OES120505-03 TT BND		Tursiops truncatus	Bottlenose Dolphin	Kingman Reef	6.4195	-162.335	-14.1878	17.9649	412.109	42.8032	146.283	15.1935	2.8172	0.9628	962.8
whale_metadata_all years compiled (2011-2012)	Nigro WHALES1 0815	2015	2012-05-05	yes	OES120505-02 TT BND		Tursiops truncatus	Bottlenose Dolphin	Kingman Reef	6.4195	-162.335	-15.2617	17.4421	404.475	41.4762	141.544	14.5143	2.8576	0.9752	975.2
whale_metadata_all years compiled (2011-2012)	Nigro WHALES1 0815	2015	2012-05-05	yes	OES120505-05 TT BND		Tursiops truncatus	Bottlenose Dolphin	Kingman Reef	6.4195	-162.335	-14.9454	17.134	417.562	42.7961	144.388	14.7984	2.89194	0.9757	975.7
whale_metadata_all years compiled (2011-2012)	Nigro WHALES1 0815	2015	2012-05-05	yes	OES120505-04 TT BND		Tursiops truncatus	Bottlenose Dolphin	Kingman Reef	6.4195	-162.335	-15.5131	16.4184	415.38	46.0459	142.492	15.7956	2.91511	0.9021	902.1
whale_metadata_all years compiled (2011-2012)	Nigro WHALES1 0815	2015	2012-05-05	yes	OES120505-01 TT BND		Tursiops truncatus	Bottlenose Dolphin	Kingman Reef	6.4195	-162.335	-15.8616	15.2273	412.109	43.5495	135.852	14.3561	3.03352	0.9463	946.3
whale_metadata_all years compiled (2011-2012)	Nigro WHALES1 0815	2015	2012-05-08	yes	OES120508-05A PE MHW		Peponocephala electra	Melon-headed Whale	Kingman Reef	6.37691	-162.371	-14.1002	17.4819	389.21	39.7437	141.544	14.4536	2.74975	0.9793	979.3
whale_metadata_all years compiled (2011-2012)	Nigro WHALES1 0815	2015	2012-05-08	yes	OES120508-09 PE MHW		Peponocephala electra	Melon-headed Whale	Kingman Reef	6.37592	-162.369	-13.9012	17.3661	402.295	40.6728	143.44	14.5021	2.80462	0.9891	989.1
whale_metadata_all years compiled (2011-2012)	Nigro WHALES1 0815	2015	2012-05-08	yes	OES120508-02 PE MHW		Peponocephala electra	Melon-headed Whale	Kingman Reef	6.37745	-162.369	-14.0515	17.3163	400.114	41.2064	142.492	14.6748	2.80797	0.971	971
whale_metadata_all years compiled (2011-2012)	Nigro WHALES1 0815	2015	2012-05-08	yes	OES120508-01 PE MHD		Peponocephala electra	Melon-headed Whale	Kingman Reef	6.37517	-162.358	-14.8996	16.8746	416.471	41.983	145.336	14.6508	2.86558	0.992	992
whale_metadata_all years compiled (2011-2012)	Nigro WHALES1 0815	2015	2012-05-08	yes	OES120508-07 PE MHW		Peponocephala electra	Melon-headed Whale	Kingman Reef	6.37624	-162.37	-14.9506	16.5973	416.471	41.6679	145.336	14.5408	2.86558	0.9995	999.5
whale_metadata_all years compiled (2011-2012)	Nigro WHALES1 0815	2015	2012-05-08	yes	OES120508-04 PE MHW		Peponocephala electra	Melon-headed Whale	Kingman Reef	6.37605	-162.372	-13.8352	17.5401	423.015	40.4992	146.283	14.0051	2.89175	1.0445	1044.5
whale_metadata_all years compiled (2011-2012)	Nigro WHALES1 0815	2015	2012-05-08	yes	OES120508-10A PE MHD		Peponocephala electra	Melon-headed Whale	Kingman Reef	6.37683	-162.371	-15.0924	16.3811	477.559	42.3143	164.258	14.5542	2.90737	1.1286	1128.6
whale_metadata_all years compiled (2011-2012)	Nigro WHALES1 0815	2015	2012-05-08	yes	OES120508-03 PE MHW		Peponocephala electra	Melon-headed Whale	Kingman Reef	6.37718	-162.37	-15.7449	15.4396	411.018	41.4375	136.801	13.7918	3.0045	0.9919	991.9
whale_metadata_all years compiled (2011-2012)	Nigro WHALES1 0815	2015	2012-05-08	yes	OES120508-08 TT BND		Tursiops truncatus	Bottlenose Dolphin	Kingman Reef	6.37678	-162.371	-14.1746	17.9947	437.193	44.4077	151.965	15.4358	2.87693	0.9845	984.5
whale_metadata_all years compiled (2011-2012)	Nigro WHALES1 0815	2015	2012-05-08	yes	OES120508-11A TT BND		Tursiops truncatus	Bottlenose Dolphin	Kingman Reef	6.40601	-162.45	-15.38	16.6281	460.102	44.5792	157.642	15.2739	2.91865	1.0321	1032.1
marine mammal summary data 2011	marine mammal summary data 2011	pre-2015	2009-10-01	yes	Tt45		Tursiops truncatus	Bottlenose Dolphin	Palmyra Atoll			-16.1201	16.1936		46.5522		15.122	3.58994	0.48
